# Supplementary material for: Changes in Tryptophan-Kynurenine Metabolism in Patients with Depression Undergoing ECT—A Systematic Review
Source: Pharmaceuticals (Basel). 2022 Nov 19;15(11):1439. doi: 10.3390/ph15111439 (PMC9694349; doi:10.3390/ph15111439)
Supplement: Supplementary file 1 [file pharmaceuticals-15-01439-s001.zip]

Archive with 8 entries (8 files):
- Document S1.pdf
- __MACOSX/._Document S1.pdf
- Table S1.xlsx
- __MACOSX/._Table S1.xlsx
- Table S2.xlsx
- __MACOSX/._Table S2.xlsx
- Table S3.pdf
- __MACOSX/._Table S3.pdf
