# Supplementary material for: Changes in Tryptophan-Kynurenine Metabolism in Patients with Depression Undergoing ECT—A Systematic Review
Source: Pharmaceuticals (Basel). 2022 Nov 19;15(11):1439. doi: 10.3390/ph15111439 (PMC9694349; doi:10.3390/ph15111439)
Supplement: Supplementary file 1 [file pharmaceuticals-15-01439-s001.zip › Document S1.pdf]

## Supplementary Document: Syntax for systematic literature search, july 2022

The syntax for the original literature search for june 2020 was identical to the one presented below. The number of records identified by each index term or free text in the syntax is indicated at the end of each line. Unlike in the original search, the results shown here were filtered on publication date.

**Ovid MEDLINE(R)** and Epub Ahead of Print, In-Process, In-Data-Review & Other Non-Indexed Citations and Daily <1946 to July 19, 2022>

1 (Kynurenine pathway or tryptophan kynurenine pathway or tryptophan kynurenine metabolism or tryptophan catabolism or tryptophan catabolite pathway or TRYCAT).mp. 2682  
2 tryptophan.mp. 65112  
3 kynurenine.mp. 6883  
4 (kynurenine tryptophan ratio or KTR).mp. 817  
5 (kynurenic acid or kynurenate or KYNA).mp. 4130  
6 anthranilic acid.mp. 1776  
7 (hydroxykynurenine or 3-hydroxykynurenine).mp. 831  
8 xanthurenic acid.mp. 674  
9 (hydroxyanthranilic acid or 3-hydroxyanthranilic acid).mp. 710  
10 (quinolinic acid or QUIN).mp. 4048  
11 picolinic acid.mp. 1106  
12 tryptophan 2,3-dioxygenase.mp. 649  
13 indoleamine 2,3-dioxygenase.mp. 4297  
14 (kynureninase or kynurenine hydrolase or KYNU).mp. 407  
15 kynurenine aminotransferase.mp. 311  
16 kynurenine 3-monooxygenase.mp. 343  
17 1 or 2 or 3 or 4 or 5 or 6 or 7 or 8 or 9 or 10 or 11 or 12 or 13 or 14 or 15 or 16 77159  
18 exp tryptophan/ 35459  
19 exp kynurenine/ 3876  
20 exp kynurenic acid/ 2501  
21 exp ortho-aminobenzoates/ 8070  
22 exp xanthurenates/ 3030  
23 exp 3-hydroxyanthranilic acid/ 340  
24 exp quinolinic acid/ 1790  
25 exp picolinic acids/ 3590  
26 exp tryptophan oxygenase/ 1993  
27 exp indoleamine-pyrrole 2,3-dioxygenase/ 3261  
28 exp kynurenine 3-monooxygenase/ 252  
29 18 or 19 or 20 or 21 or 22 or 23 or 24 or 25 or 26 or 27 or 28 54079  
30 17 or 29 89654  
31 (Electroconvulsive or Electroshock or Electroconvulsive Therapy or Electroconvulsive Therapies or Electroshock Therapy or Electroshock Therapies or Electric Convulsive Therapy or Electric Convulsive Therapies or Electric Shock Therapy or Electric shock Therapies or Electroconvulsive Shock Therapy or Electroconvulsive Shock Therapies or Electroconvulsive shock or ECT).mp. 33799  
32 exp Electroconvulsive Therapy/ 13965  
33 31 or 32 33799  
34 30 and 33 267  
35 limit 34 to yr="2020 -Current" 6

**Embase** 1974 to 2022 July 19

- 1 (Kynurenine pathway or tryptophan kynurenine pathway or tryptophan kynurenine metabolism or tryptophan catabolism or tryptophan catabolite pathway or TRYCAT).mp. 3581
- 2 tryptophan.mp. 79946
- 3 kynurenine.mp. 9464
- 4 (kynurenine tryptophan ratio or KTR).mp. 1919
- 5 (kynurenic acid or kynurenate or KYNA).mp. 5093
- 6 anthranilic acid.mp. 4175
- 7 (hydroxykynurenine or 3-hydroxykynurenine).mp. 1152
- 8 xanthurenic acid.mp. 899
- 9 (hydroxyanthranilic acid or 3-hydroxyanthranilic acid).mp. 907
- 10 (quinolinic acid or QUIN).mp. 5581
- 11 picolinic acid.mp. 2210
- 12 tryptophan 2,3-dioxygenase.mp. 1813
- 13 indoleamine 2,3-dioxygenase.mp. 9057
- 14 (kynureninase or kynurenine hydrolase or KYNU).mp. 605
- 15 kynurenine aminotransferase.mp. 584
- 16 kynurenine 3-monooxygenase.mp. 553
- 17 1 or 2 or 3 or 4 or 5 or 6 or 7 or 8 or 9 or 10 or 11 or 12 or 13 or 14 or 15 or 16 100720
- 18 exp tryptophan/ 49648
- 19 exp kynurenine/ 7397
- 20 exp kynurenic acid/ 4162
- 21 exp anthranilic acid/ 1770
- 22 exp 3-hydroxykynurenine/ 905
- 23 exp xanthurenic acid/ 759
- 24 exp 3-hydroxyanthranilic acid/ 623
- 25 exp quinolinic acid/ 3530
- 26 exp picolinic acid/ 1189
- 27 exp tryptophan 2,3 dioxygenase/ 1647
- 28 exp indoleamine 2,3 dioxygenase/ 7720
- 29 exp kynureninase/ 451
- 30 exp Kynurenine 3 monooxygenase/ 520
- 31 exp Kynurenine aminotransferase/ 456
- 32 18 or 19 or 20 or 21 or 22 or 23 or 24 or 25 or 26 or 27 or 28 or 29 or 30 or 31 65535
- 33 17 or 32 100720
- 34 (Electroconvulsive or Electroshock or Electroconvulsive Therapy or Electroconvulsive Therapies or Electroshock Therapy or Electroshock Therapies or Electric Convulsive Therapy or Electric Convulsive Therapies or Electric Shock Therapy or Electric Shock Therapies or Electroconvulsive Shock Therapy or Electroconvulsive Shock Therapies or Electroconvulsive Shock or ECT).mp. 30370
- 35 exp Electroconvulsive Therapy/ 20071
- 36 34 or 35 30370
- 37 33 and 36 310
- 38 limit 37 to yr="2020 -Current" 23

## APA PsycInfo 1806 to July Week 2 2022

- 1 (Kynurenine pathway or tryptophan kynurenine pathway or tryptophan kynurenine metabolism or tryptophan catabolism or tryptophan catabolite pathway or TRYCAT).mp. 491
- 2 tryptophan.mp. 4461
- 3 kynurenine.mp. 840
- 4 (kynurenine tryptophan ratio or KTR).mp. 47
- 5 (kynurenic acid or kynurenate or KYNA).mp. 747

6 anthranilic acid.mp. 35  
 7 (hydroxykynurenine or 3-hydroxykynurenine).mp. 98  
 8 xanthurenic acid.mp. 42  
 9 (hydroxyanthranilic acid or 3-hydroxyanthranilic acid).mp. 35  
 10 (quinolinic acid or QUIN).mp. 515  
 11 picolinic acid.mp. 28  
 12 tryptophan 2,3-dioxygenase.mp. 49  
 13 indoleamine 2,3-dioxygenase.mp. 252  
 14 (kynureninase or kynurenine hydrolase or KYNU).mp. 12  
 15 kynurenine aminotransferase.mp. 35  
 16 kynurenine 3-monooxygenase.mp. 54  
 17 1 or 2 or 3 or 4 or 5 or 6 or 7 or 8 or 9 or 10 or 11 or 12 or 13 or 14 or 15 or 16 5459  
 18 exp tryptophan/ 2384  
 19 17 or 18 5615  
 20 (Electroconvulsive or Electroshock or Electroconvulsive Therapy or Electroconvulsive Therapies or Electroshock Therapy or Electroshock Therapies or Electric Convulsive Therapy or Electric Convulsive Therapies or Electric Shock Therapy or Electric shock Therapies or Electroconvulsive Shock Therapy or Electroconvulsive Shock Therapies or Electroconvulsive shock or ECT).mp. 18654  
 21 exp Electroconvulsive Shock Therapy / 7077  
 22 20 or 21 18654  
 23 19 and 22 101  
 24 limit 23 to yr="2020 -Current" 4

**Pubmed** from 2020/6/3 - 2022/7/20

((kynurenine pathway[Title/Abstract] OR tryptophan kynurenine pathway[Title/Abstract] OR tryptophan kynurenine metabolism[Title/Abstract] OR tryptophan catabolism[Title/Abstract] OR tryptophan catabolite pathway[Title/Abstract] OR TRYCAT[Title/Abstract] OR tryptophan[Title/Abstract] OR kynurenine[Title/Abstract] OR kynurenine tryptophan ratio[Title/Abstract] OR KTR[Title/Abstract] OR kynurenic acid[Title/Abstract] OR kynurenate[Title/Abstract] OR KYNA[Title/Abstract] OR anthranilic acid[Title/Abstract] OR hydroxyanthranilic acid[Title/Abstract] OR 3-hydroxyanthranilic acid[Title/Abstract] OR quinolinic acid[Title/Abstract] OR QUIN[Title/Abstract] OR picolinic acid[Title/Abstract] OR tryptophan 2,3-dioxygenase[Title/Abstract] OR indoleamine 2,3-dioxygenase[Title/Abstract] OR kynureninase[Title/Abstract] OR kynurenine hydrolase[Title/Abstract] OR KYNU[Title/Abstract] OR kynurenine aminotransferase[Title/Abstract] OR kynurenine 3-monooxygenase) AND (electroconvulsive[Title/Abstract] OR electroshock[Title/Abstract] OR electroconvulsive therapy[Title/Abstract] OR electroconvulsive therapies[Title/Abstract] OR electroshock therapy[Title/Abstract] OR electroshock therapies[Title/Abstract] OR electric convulsive therapy[Title/Abstract] OR electric convulsive therapies[Title/Abstract] OR electric shock therapy[Title/Abstract] OR electric shock therapies[Title/Abstract] OR electroconvulsive shock therapy[Title/Abstract] OR electroconvulsive shock therapies[Title/Abstract] OR electroconvulsive shock[Title/Abstract] OR ECT[Title/Abstract]) 87

*Filters applied: from 2020/6/4 - 2022/7/20 3*
