# Supplementary material for: Changes in Tryptophan-Kynurenine Metabolism in Patients with Depression Undergoing ECT—A Systematic Review
Source: Pharmaceuticals (Basel). 2022 Nov 19;15(11):1439. doi: 10.3390/ph15111439 (PMC9694349; doi:10.3390/ph15111439)
Supplement: Supplementary file 1 [file pharmaceuticals-15-01439-s001.zip › Table S1.xlsx]

## Sheet: Kyn pathway, ECT series
Supplementary Table 1: Reported levels of tryptophan, kynurenines, ratios and related biomarkers before and after a series of ECT and corresponding analyses of change
		Author (year)		Guloksuz (2015)	Schwieler 1 (2016)		Allen 1 (2018)	Aarsland 2 (2019)		Ryan (2020)		Aarsland (2022)		Olajossy (2018)
		Participants		Patients (n=19)	Patients (n=15)	Controls (n=14)	Patients (n=18)	Patients (n=21)	Controls (n=12)	Patients (n=94)	Controls (n=57)	Patients (n=48)		SAD (n=7)	DBD (n=11)	RDD (n= 32)	Controls (n=48)
		Unit		µg/ml (total Trp), ng/ml, ratio	µmol/L, nmol/L, ratio	μmol/l, nmol/l, ratio	ng/ml, ratio	µmol/L, nmol/L, ratio	μmol/l, nmol/l, ratio	µmol/L, nmol/L, ratio	μmol/l, nmol/l, ratio	µmol/L, nmol/L, ratio		Not reported			Not reported
		Distribution		Mean (SD)	Mean (SD)	Mean (SD)	Mean	Median (IQR)	Median (IQR)	Mean (SD)	Mean (SD)	Median (IQR)		Median			Median
		Test / estimate		Multilevel linear regression / B	Wilcoxon matched-paired signed-rank test / ?		t-test / t	Wilcoxon paired test / ?		Linear model (for log(metabolite)), Wilcoxon signed rank (for ratios) / F, Z		Paired Wilcoxon signed-rank test / Median percentage change		Friedman's ANOVA and Kendalls coefficient of concordance / χ2
Biomarkers
Trp	Total Trp	Pre		8.34 (1.23)	85.5 (24.3)	73.6 (12.4)	9173 (2825)	73.5 (11.0)	76.1 (10.9)	54.3 (10.99)	65.6 (12.47)	63.3 (20.2)
		Post		?	70.7 (18.2)		8419 (2400)	68.2 (13.3)	70.7 (8.19)	56.36 (10.60)		66.6 (15.9)
		Estimate / p-value		-0.003 / 0.448	? / <0.05		t=? / n.s.	? / 0.36	-7.15 / 0.15	F=4.02 / 0.048		1.50 / 0.24
Kynurenines	Kyn	Pre		535.44	3.30 (1.15)	3.00 (0.73)	461 (144)	1.53 (0.57)	1.44 (0.49)	1.52 (0.47)	1.64 (0.41)	2.00 (0.75)
		Post		?	2.61 (0.89)		502 (268)	1.50 (0.60)	1.51 (0.57)	1.66 (0.47)		1.92 (0.59)
		Estimate / p-value		0.92 / 0.061	? / <0.01		t=? / n.s.	? / 0.43	5.03 / 0.02	F=7.362 / 0.008		0.96 / 0.71
	KA	Pre		9.35	24.4 (8.07)	41.9 (12.4)	4.92 (2.44)	36.7 (18.8)	50.1 (12.4)	41.34 (19.42)	54.85 (19.42)	52.0 (28.2)		0.16	0.12	0.15	0.20
		Post			26.2 (9.69)		4.84 (3.53)	36.2 (26.2)	42.4 (14.3)	44.02 (20.61)		48.7 (23.3)		0.16	0.11	0.17
		Estimate / p-value		0.04 / 0.001	? / n.s.		t=? / n.s.	? / 0.11	-15.4 / 0.003	F=2.18 / 0.143		2.72 / 0.81		0.33 / 0.88	0.66 / 0.95	1.41 / 0.70
	HK	Pre		8.57				32.6 (12.9)	37.8 (7.25)	41.68 (15.64)	42.18 (12.03)	53.9 (37.0)
		Post		?				41.4 (19.1)	34.0 (10.3)	45.23 (18.0)		51.9 (29.3)
		Estimate / p-value		0.02 / 0.161				? / 0.05	-9.93 / 0.30	Z=2773.5 / 0.041		9.63 / 0.30
	AA	Pre						15,5 (6,30)	20.4 (8.78)	12.67 (3.98)	14.64 (4.07)	17.8 (4.75)
		Post						16,3 (6,20)	16.5 (3.15)	13.58 (4.82)		17.5 (5.50)
		Estimate / p-value						? / 0.39	-18.9 / 0.03	F=3.89 / 0.052		0.29 / 0.77
	HAA	Pre		54.57				28,2 (13,9)	38.0 (13.3)	32.84 (14.64)	41.23 (20.83)	33.5 (17.5)
		Post		?				41,7 (18,8)	30.2 (15.7)	36.20 (17.76)		35.6 (25.7)
		Estimate / p-value		-0.08 / 0.294				? / 0.03	-20.4 / 0.13	F=3.73 / 0.056		10.6 / 0.12
	XA	Pre						9,71 (5,34)	15.5 (5.65)	10.58 (6.63)	18.65 (9.72)	10.7 (9.33)
		Post						11,4 (9,17)	15.7 (10.8)	12.0 (7.01)		12.2 (8.95)
		Estimate / p-value						? / 0.20	1.29 / 0.47	Z=2683 / 0.089		16.1 / 0.12
	Pic	Pre						24,5 (14,6)	32.0 (13.0)	32.0 (20.72)	44.21 (26.96)	39.4 (23.8)
		Post						31,5 (14,2)	30.0 (15.5)	33.73 (25.21)		42.4 (23.5)
		Estimate / p-value						? / 0.01	-6.10 / 0.31	F=0.748 / 0.389		7.70 / 0.81
	QA	Pre			635.7 (239.2)	603.2 (215.0)		329 (189)	318 (127)	419.4 (216.3)	400.8 (143.7)	512 (352)
		Post			513.8 (256.5)			370 (152)	301 (98.8)	448.2 (210.2)		489 (247)
		Estimate / p-value			? / <0.001			? / 0.35	-5.5 / 0.48	F=3.44 / 0.067		-3.23 / 0.41
Ratios	KTR	Pre		63.75	0.0384 (0.008342)	0.04 (0.007845)	0.0527284 (0.0177521)	20.8 (6.56)	18.8 (5.14)			32.3 (15.7)
		Post		?	0.038 (0.009411)		0.05807656 (0.01647596)	20.2 (8.58)	19.1 (5.32)			29.4 (13.7)
		Estimate / p-value		0.14 / 0.001	? / n.s.		t=? / n.s.	? / 0.16	1.70 / 0.52	? / 0.065		-2.51 / 0.48
	KA/Kyn	Pre		17.18			0.009784233 (0.004211415)	26.1 (10.2)	31.9 (2.36)
		Post		?			0.008830895 (0.003578453)	27.9 (9.70)	28.0 (8.56)
		Estimate / p-value		0.07 / <0.001			t=? / n.s.	? / 0.23	-12.4 / 0.13	? / 0.647
	KA/HK	Pre		1.23				10.0 (4.63)	12.7 (2.16)			9.91 (4.39)
		Post		?				11.1 (5.66)	12.1 (5.39)			9.44 (4.12)
		Estimate / p-value		0.01 / 0.008				? / 0.89	-4.97 / 0.38			-16.1 / 0.02
	QA/KA	Pre			28.4 (13.7)	14.8 (4,93)
		Post			21.3 (7.83)
		Estimate / p-value			? / <0.05
	KA/QA	Pre						11.0 (3.83)	15.2 (4.45)			9.68 (3.67)
		Post						11.8 (4.73)	13.6 (6.47)			9.74 (3.04)
		Estimate / p-value						? / 0.32	-10.2 / 0.05			-2.70 / 0.70
	XA/HK	Pre						25.7 (12.9)	44.3 (13.8)
		Post						27.1 (12.2)	41.3 (24.0)
		Estimate / p-value						? / 0.63	-6.86 / 0.79
	Pic/QA	Pre						69.2 (21.8)	104.7 (39.7)
		Post						87.6 (51.7)	93.2 (36.4)
		Estimate / p-value						? / 0.02	-11.0 / 0.68
	QA/Kyn	Pre
		Post
		Estimate / p-value								p = 0.702
Other biomarkers	Other 1	Biomarker name						MADRS	Creatinin
		Pre						34.0 (8.00)	73.5 (10.9)
		Post						15.0 (15.0)	72.1 (11.1)
		Estimate / p-value						? / 0.00	-1.90 / 0.003
	Other 2	Biomarker name						Neopterin	Neopterin	CRP	CRP	Neopterin
		Pre						17.7 (9.70)	14.8 (6.03)	0.63 (0.92)	0.26 (0.42)	29.2 (17.2)
		Post						23.3 (9.00)	16.6 (9.50)	0.62 (0.74)		29.4 (21.2)
		Estimate / p-value						? / 0.00	12.2 / 0.33	Z=1805 / p=0.27		1.30 / 0.43
	Other 3	Biomarker name						Riboflavin	Riboflacin	TNF-α	TNF-α	Riboflavin
		Pre						12.6 (5.60)	13.0 (4.45)	3.34 (1.00)	2.68 (0.69)	22.0 (20.6)
		Post						12.6 (9.90)	14.5 (4.73)	3.47 (1.14)		20.2 (23.3)
		Estimate / p-value						? / 0.75	11.2 / 0.53	F3.84 / 0.05		-1.12 / 0.70
	Other 4	Biomarker name						PLP	PLP	TNF-α mRNA	TNF-α mRNA	PLP
		Pre						46.0 (33.6)	63.5 (9.48)	0.97 (0.30)	1.12 (0.32)	22.8 (21.6)
		Post						42.7 (45.9)	65.0 (18.4)	1.04 (0.27)		22.8 (19.9)
		Estimate / p-value						? / 0.79	2.28 / 0.85	F=4.37 / p=0.04		-17.5 / 0.29
Thick outline indicate significant change. 1 Biomarker levels were provided by the authors after written request. 2 Second time-point measures and percentage change for controls were not reported in the original published report. Abbreviations: AA, anthranilic acid; ANOVA, analysis of variance; CRP, C-reactive protein; DBD, depression in bipolar disorder; ECT, electroconvulsive therapy; HAA, 3-hy…

## Sheet: Trp, ECT series
Supplementary Table 1 (continued): Reported levels of tryptophan and related biomarkers before and after a series of ECT and corresponding analyses of change
		Author (year)		Coppen (1973)		Abrams (1976)	D'Elia (1977)	Kirkegaard (1978)	Whalley (1980)	Hoekstra (2001)
		Participants		Patients (n=6)	Controls (n = 26)	Patients (n=6)	Patients (n=24)	Patients (n=10)	Patients (n=9)	Patients (n=20)	Controls (n=29)
		Unit		µg/ml, %	µg/ml, %	ng/ml	mg%	nmol/ml	nmol/ml	µmol/l	µmol/l
		Distribution		Mean (SE)	Mean (SE)	Mean (SE)	Median (SD)	? (?)	Mean (SD)	Mean (SD)	Mean (SD)
		Test / estimate		? / ?	? / ?	? / ?	Student's t-test / ?	Paired Wilcoxon test / ?	Paired Student t-test / ?	Student's t-test / ?
Biomarkers
Trp	Free Trp	Pre		0.66 (0.10)	1.39 (0.07)			4.3 (1.0)	6.9 (2.0)
		Post		1.22 (0.10)				4.4 (0.8)	7.2 (1.2)
		Estimate / p-value		? / <0.01				? / n.s.	? / n.s.
	Total Trp	Pre		10.65 (0.67)	12.4 (0.3)	347.0 (90.5)	1.27 (0.30)	32.5 (6.1)	54.4 (8.9)	35.5 (9.0)	45.6 (6.1)
		Post		11.55 (0.73)		420.2 (22.9)	1.23 (0.48)	27.6 (4.9)	47.4 (6.5)	38.7 (7.7)	no measure
		Estimate / p-value		? / n.s.		F=2.8 / p=n.s.	not tested	? / <0.01	? / <0.01	? / n.s.
Other biomarkers	Other 1	Biomarker name		Free Trp as % of total Trp		DRS	Total CODS	Free Trp as % of total Trp		HRS-D
		Pre		6.32 (1.12)	11.2 (0.5)	20.8 (6.5)	13.8	13.4 (2.4)		31
		Post		10.58 (0.72)		3.0 (0.6)	2.3	15.8 (2.2)		11
		Estimate / p-value		? / <0.005		F = 63.3 / 0.001	not tested	? / <0.05
	Other 2	Biomarker name					Total NRS	Albumin, ? / ?, g/l		Neopterin, nmol/l	Neopterin, nmol/l
		Pre					22	39.7 (2.5)		21.7 (8.2)	19.6 (6.5)
		Post					6.5	40.8 (2.1)		23.6 (8.2)	no measure
		Estimate / p-value					not tested	? / n.s.		? / 0.03
Comments						Total Trp was measured in CSF	No statistic test reported for comparison of pre and post ECT concentrations.			Patients' pre-treatment Trp levels were significantly lower than that of controls (p<0.0005).
Thick outline indicate significant change. Abbreviations: CODS, Cronholm-Ottosson Depression Scale; CSF, cerebrospinal fluid; DRS, Depression Rating Scale; ECT, electroconvulsive therapy; HRS-D, Hamilton Depression Rating Scale; NRS, Nurses' rating scale; n.s., non-significant; SD, standard deviation; SE, standard error; Trp, tryptophan.

## Sheet: Trp, single ECT
Supplementary Table 1 (continued): Reported levels of tryptophan and related biomarkers before and after a single ECT and corresponding analyses of change
		Author (year)		Stelmasiak (1974)	Whalley (1980)		Sawa (1981)	Mokhtar (1997)		Palmio (2005)
		Participants		Patients (n=18, 15 at 15min)	Patients (n=11)	Controls (n=11) undergoing anesthesia and cystoscopy	Patients (n=9)	Patients (n=10)	Controls (n=4) undergoing anesthesia and minor surgery	Patients (n=10)
		Unit		µg/ml	nmol/ml	nmol/ml	nmol/ml	µg/ml (free Trp), µmol/ml (total Trp), ratio	µg/ml (free Trp), µmol/ml (total Trp), ratio	µmol/l
		Distribution		Mean (SD)	Mean (SD)	Mean (SD)	Mean (SD)	Mean (SEM)	Mean (SEM)	Mean (SD)
		Test / estimate		Paired Student's t-test / ?	Paired Student's t-test / ?	Paired Student's t-test / ?	t-test / ?	ANOVA / ?	ANOVA / ?	Paired sample t-test / ?
Biomarkers	Time points
Free Trp	Baseline	value		1.07 (0.41)	6.9 (2.0)	6.3 (1.4)	3.92 (1.23) (range: 1.81 - 5.89)	1.12 (0.11)	0.99 (0.06)
	First post measure	time		1 min	10 min after convulsion	10 min after recovery	1 min	15 min
		value		1.42 (0.50)	7.1 (2.0)	7.2 (1.8)	increased	1.00 (0.12)	1.04 (0.05)
		Estimate / p-value		? / <0.01	? / n.s.	? / n.s.	? / <0.01	? / n.s.	? / n.s.
	Second post measure	time		15 min			5 min	30 min
		value		1.32 (0.58)			normalised	1.06 (0.12)	1.06 (0.08)
		Estimate / p-value		? / 0.02			? / n.s.	? / n.s.	? / n.s.
	Third post measure	time		30 min			10 min	45 min
		value		1.26 (0.35)			decreased	1.03 (0.11)	1.03 (0.11)
		Estimate / p-value		? / n.s.			? / n.s.	? / n.s.	? / n.s.
	Fourth post measure	time		60 min			30 min	60 min
		value		1.05 (0.43)			decreased	1.05 (0.08)	0.99 (0.05)
		Estimate / p-value		? / n.s.			? / n.s.	? / n.s.	? / n.s.
	Fifth post measure	time					1:00:00
		value					decreased
		Estimate / p-value					? / <0.05
	pooled	Estimate / p-value						F = ? / n.s.	F = ? / n.s.
Total Trp	baseline	value		8.44 (1.87)	54.4 (8.9)	52.5 (9.4)	69.7 (22.5) range: 45.2 - 124.5	47 (3)	45 (3)	29.5 (6.7)
	First post measure	time		1 min	10 min after convulsion	10 min after recovery	1 min	0:15:00		2h
		value		8.03 (2.39)	48.8 (6.6)	45.6 (7.3)	decreased	40 (2)	35 (1)	39.0 (8.6)
		Estimate / p-value		? / n.s.	? / <0.05	? / <0.01	? / n.s	? / n.s.	? / <0.05 (unspecified)	? / <0.05
	Second post measure	time		15 min			5 min	0:30:00		6h
		value		8.81 (2.99)			decreased	40 (3)	34 (3)	42.4 (8.9)
		Estimate / p-value		? / n.s.			? / <0.01	? / n.s.	? / <0.05 (unspecified)	? / <0.005
	Third post measure	time		30 min			10 min	0:45:00		24h
		value		8.67 (2.88)			decreased	38 (3)	36 (3)	39.3 (12.2)
		Estimate / p-value		? / n.s.			? / <0.01	? / <0.05	? / n.s.	? / <0.05
	Fourth post measure	time		60 min			30 min	60 min		48h
		Value		7.43 (2.19)			decreased	34 (3)	34 (1)	30.1 (6.9)
		Estimate / p-value		? / n.s.			? / n.s.	? / <0.005	? / <0.05 (unspecified)	? / n.s.
	Fifth post measure	time					60 min
		value					normalised
		Estimate / p-value					? / n.s.
	pooled	Estimate / p-value						F = 2.81 / <0.37	F = 3.83 / <0.24
Biomarkers
Other biomarkers	Other 1	Biomarker name						NEFA, mmol/L
		Pre						0.35 (0.06)	0.34 (0.05)
		Post						0.48 (0.07)	0.49 (0.08)
		Estimate / p-value
	Other 2	Biomarker name						TRP/CAA
		Pre						0.088 (0.006)	0.099 (0.004)
		Post						0.076 (0.008)	0.081 (0.002)
		Estimate / p-value
Comments					Before and after first ECT	Before and after anesthesia		"Others" measured at 60 min post.	"Others" measured at 60 min post.
Thick outline indicate significant change. Abbreviations: CAA, competing amino acid; ECT, electroconvulsive therapy; NEFA, non-esterified fatty acid; n.s., non-significant; SD, standard deviation; SE, standard error; SEM, standard error of the mean; Trp, tryptophan.
