# Supplementary material for: Changes in Tryptophan-Kynurenine Metabolism in Patients with Depression Undergoing ECT—A Systematic Review
Source: Pharmaceuticals (Basel). 2022 Nov 19;15(11):1439. doi: 10.3390/ph15111439 (PMC9694349; doi:10.3390/ph15111439)
Supplement: Supplementary file 1 [file pharmaceuticals-15-01439-s001.zip › Table S2.xlsx]

## Sheet: Trp metabolism
Supplementary table 2 Detailed overview of the reviewed studies' declaration and handling of factors that can affect analyses of tryptophan and kynurenines in the context of ECT
Author (year)	n *		Factors that can affect levels of tryptophan and kynurenines
			Inflammation	Age	Kidney function	BMI	Sex	Nutrition	Fasting	Vitamin status	Stress	Alcohol and tobacco	NEFA	CAA	Medication	Glucose	Liver function
Guloksuz (2015)	19			52.6 (14.4) 1. Included as covariable in all analyses.			13♀ / 6♂. Included as covariable in all analyses.		Yes, overnight						Exclusion criterion (immuno-modulating medications)
Schwieler (2016)	19 (15)		IL-1β, IL-2, IL-6, IL-8, IL-10, IL-12p70, TNF-α, IFN-γ, GM-CSF. Analyses of change.	41.0 (25.0-54.0) 2			8♀ /11♂		Yes, since the evening before blod sample collection
Allen (2018)	18		IL-6, IL-8, IL-10, IFN-γ	57.4 (14.7) 1		Body weight. Exclusion criterion (>10% of ideal body weight).	12♀ / 6♂		Before ECT: yes, after ECT: yes		Saliva cortisol (cortisol awakening response). Analysis of change.	Smokers (n = 16)
Aarsland (2019)	21		Neopterin. Analysis of change.	47.0 (20.0) 2	Creatinine. Exclusion criteria (>120μmol/l).		13♀ / 8♂		Before ECT: yes, after ECT: yes	PLP, riboflavin		Smokers (n = 14, 52%). Cotinine included as covariable in group comparison.
Ryan (2020)	94		CRP, TNF-α, TNF-α mRNA. Analyses of change.	55.48 (14.72) 1. Included as covariable in group comparison.		26.76 (5.01) 1. Included as covariable in group comparison.	58♀ / 36♂. Included as covariable in group comparison.		Yes, not further specified	PLP, riboflavin (Ryan 2020b)		Smokers (n = 40, 42.55%). Included as covariable in group comparison.
Aarsland (2022)	48		Neopterin. Used for stratification in sub-analyses.	73.0 (12.3) 2	Baseline creatinine		30♀ / 18♂		Before ECT: yes, after ECT: yes	PLP, riboflavin		Non-smokers (n = 38, 78.9%). Included as covariable in group comparison. Never alcohol (n = 31, 72.1%).
Olajossy (2017)	50			49.4 (12.7) 1 44.7 (13.8) 1 33.3 (8.6) 1. Used in sub-analyses.			19♀ / 13♂ 7♀ / 4♂ 4♀ / 3♂. Used in sub-analyses.
Coppen (1973)	6						6♀	Full hospital diet for at least a week prior to ECT	Yes, since the evening before each test
Abrams (1976)	6
D'Elia (1977)	24			48.0 (12.5) 1 (range 22-64). Exclusion criterion (>65 years).			15♀ / 9♂. Used for stratification.		Yes, since 12 p.m. the day before testing
Kirkegaard (1978)	10			63 (37-77) 3			7♀ / 3♂	Ordinary hospital diet	Before ECT: yes, after ECT: yes								Albumin. Analysis of change.
Whalley (1980)	12 (11)			49 (13.9) 1			9♀ / 3♂		Yes, overnight for all samples
Hoekstra (2001)	20			52 (13.1) 1			13♀ / 7♂		Before ECT: yes, after ECT: not specified					Phenylalanine, tyrosine, isoleucine, leucine, valine, Trp-ratio
Stelmasiak (1974)	18 (15)			48 (20-70) 3. Used in sub-analyses.			11♀ / 7♂. Used in sub-analyses.		Yes, since six hours before ECT				Fatty acids. Analyses of change.
Sawa (1981)	9			40.7 (20-52) 3			5♀ / 4♂		Yes, for 17 hours before ECT				NEFA. Analyses of change.
Mokhtar (1997)	10			48.5 (4.3) 4 (range 24-66)			5♀ / 5♂		Yes, since the evening before ECT		Serum cortisol. Analysis of change.		NEFA. Analyses of change.	Phenylalanine, tyrosine, isoleucine, leucine, valine, Trp-ratio. Analyses of change.		Glucose. Analysis of change.	Albumin. Analysis of change.
Palmio (2005)	10			55.6 (28-70) 3			7♀ / 3♂		Yes, since the evening before ECT					Phenylalanine, tyrosine, isoleucine, leucine, valine. Analyses of change.
				Measure at baseline / declared				Analyses of change after ECT / used as covariable or for stratification in sub-analyses						Included as covariable in main analyses
				Not measured / not declared / not considered
The table is limited to factors that have been included in at least one of the reviewed studies. * The number in parentheses indicates the number of patients with repeated measures. 1 mean (standard deviation); 2 median (interquartile range); 3 mean (range); 4 mean (standard error of the mean). Abbreviations: BMI, body mass index; CAA, competing amino acid; CRP, C-reactive protein; ECT, electroco…

## Sheet: Patients, intervention, design
Supplementary table 2 (continued) Detailed overview of the reviewed studies' declaration and handling of factors that can affect analyses of tryptophan and kynurenines in the context of ECT
Author (year)	n *		Patient characteristics									Intervention and study design
			Depression characteristics			Psychotropic medication			Comorbidity			Clinical measures	ECT details	Anesthetics and muscle relaxants	Number of ECT sessions	Sample time after last ECT	Symtpom score after ECT, response, remission
			Diagnosis	Severity	Other	During ECT	Discontinued before ECT	Changes during ECT	Psychiatric	Somatic
Guloksuz (2015)	19		Unipolar (12) or bipolar (7) depression	HDRS 23.4 (6.4) 1 BDI 32.8 (11.1) 1		Yes (n = 19, 100%), antidepressants, mood stabilizers, antipsychotics	Benzodiazepine	No	Exclusion criterion (cancer, cerebrovascular disorders, organic psychiatric syndroms, drug abuse, mental retardation, dementia, neurodegenerative disorders, inflammatory condition)			HDRS. Used in sub-analyses	Seizure duration: 52 s (10-200 s) 3 Charge: 462 mC (150-90 mC) 3		Mean = 6.1 (range: 3-11)		HDRS after ECT utilized to assess baseline Trp metabolite and ratio levels as predictors for time to ECT response
Schwieler (2016)	19 (15)		Major depressive disorder	MADRS 37.0 (28.8-44.3) 2		Lithium (n = 1), antipsychotics (n = 3), benzodiazepines (n = 8), and hypnotics (n = 12)						MADRS	Right unilateral, ultrabrief or brief pulse. Dose adjusted by age, sex and outcome.	Atropine, thiopental and succinylcholine	3		MADRS: 20.5 (14.0-26.5) 2. Analyses of correlation between change in QA and change in MADRS after ECT.
Allen (2018)	18		Major depressive episode	HDRS 20.2 (1.5) 4		Yes (n = 15), SSRI, SNRI, TCA, mirtazapine			Anxiety (n = 10), history of drug dependence (n = 1)	Exclusion criterion (infection, endocrine, immune or metabolic disorder such as autoimmune disorders, inflammatory bowel disease or acquired immunodeficiency syndrom)		HDRS			Median = 8 (range: 5-12) (from Allen et al. 2015)		9 responders (50%). Analyses of correlation between change in kynurenines and change in HDRS after ECT.
Aarsland (2019)	21		Moderate to severe unipolar or bipolar depression	MADRS 34.0 (8.0) 2	Age at debut of depressive symptoms, years since debut, number of episodes, length of current episode, previous ECT, psychotic symptoms (n = 4, 15.4%).	Yes (n = 27, 100%), antidepressants, mood stabilizers, antipsychotics		No		Exclusion criterion (kidney failure)		MADRS	Right unilateral, brief or ultrabrief pulse. Constant current (900 mA).	Thiopental and succinylcholine	Responders: median = 12.3, Non-responders median = 12.2	10 days (6 days) 2 after last ECT	MADRS: 15.0 (15.0) 2. 12 responders (57.1%) and 9 non-responders. Used for stratification in sub-analyses.
Ryan (2020)	94		Unipolar (n = 73) or bipolar (n = 21) depression.	HAM-D24 31.0 (6.57) 1	Psychotic features (n = 21)	SSRI (n = 22), SNRI (n = 48), TCA (n = 25), MAOI (n = 10), mirtazapine (n = 32), bupropion (n = 1), lithium (n = 34), sodium valproate (n = 6), antipsychotics (n = 65), benzodiazepines (n = 49), other hypnotics (n = 56), pregabaline (n = 5), other (n = 16)				Exclusion criterion (immune disorder, major neurological illness, medically unfit for general anesthesia)		MADRS	Unilateral (n = 48) or bitemporal (n = 46)	Methohexital and succinylcholine	7.96 (2.47) 1	1 - 3 days after last ECT	HAM-D24: 10.44 (8.20) 1. 50 remitters (53.19%)
Aarsland (2022)	49		Severe unipolar depression	MADRS 33.0 (14.0) 2	Number of previous episodes, length of index episode, age at onset, psychotic features (n = 25, 52.1%)	Yes (n = 21) (antidepressants (n = 15), antipsychotics (n = 6))		No	Exclusion criterion (schizoaffective disorder, bipolar disorder)	Exclusion criterion (major neurological illness). Presence of other somatic comorbidity was used for stratification in sub-analyses		MADRS	Right unilateral, brief puls. Switch to bilateral on specified conditions.		10 (8) 2 (range = 4-29)	5 days (5.25 days) 2 after last ECT	30 remitters and 18 non-remitters. Used for stratification in sub-analyses.
Olajossy (2017)	50		Major depression in recurrent depressive disorder, bipolar disorder and schizoaffective disorder	MADRS, GAF. Used in sub-analyses	Duration of symptoms, number of phases, duration of the current phase. Used in sub-analyses.	Antidepressants (majority of patients)	Barbiturat, benzodiazepin, litium and other mood-stabilizing drugs that significantly affected seizure threshold					MADRS, GAF. Used in sub-analyses	Bilateral, fronto-temporal		12
Coppen (1973)	6		depression			Medication free	None		No history of manic illness			Clinical recovery
Abrams (1976)	6		endogenous depression	DRS 20.8 (6.5) 1		Medication free since at least one week before start of treatment						DRS before and after			6.7 (4-8) 3
D'Elia (1977)	24		unipolar (11), bipolar (2) or not yet classified (11) depression	CODS median = 13.8		Antidepressants (n = 12, 50%)				Exclusion criterion (somatic disease which could have a relation to the depressive period)		CODS and NRS before ECT and 4 days after last ECT			6.1 (3-12) 2		Correlation analyses of baseline Trp and post-treatment CODS and NRS
Kirkegaard (1978)	10		Endogenous depression, unipolar (n = 3) or not classified (n = 7)	HDRS mean ≈ 26.0		Medication free since one week before start of treatment, except diazepam and kloralodol						HDRS			10.5 (2.6) 1
Whalley (1980)	12 (11)		Unipolar depression	HDRS 26.2 (7.6) 1		Amitriptyline (n = 7), imipramine (n = 1), naïve (n = 4)			Symptoms of schizophrenia was exclusion criterion			HRS		Thiopentone and suxamethonium	Range = 4-9	10 minutes after convulsion	HRS: 11.4 (4.2) 1 after the full ECT series
Hoekstra (2001)	20		Major depression	HDRS mean = 31.0	Psychotic features (n = 10). Used for stratification in sub-analyses.	Medication free since at least seven days before start of treatment		Changes for some patients between last ECT and last blood sample		Exclusion criterion (serious disease known to influence biopterin metabolism, like infectious disease, autoimmune disorders, neoplastic disorders, Parkinson disease or dementia)		HDRS			Mean = 11		HDRS: mean = 11.0. 15 responders (75%). Used for stratification in analyses of change after ECT.
Stelmasiak (1974)	18 (15)		Endogenous depression			Imipramine, amitriptyline, barbiturate				Free of serious organic disease			Unilateral. Dose: 15-45 joules. Seizure duration used in sub-analyses.	Barbiturate and succinylcholine. Plasma concentration of barbiturate used in sub-analyses.	One single ECT	1, 15, 30 and 60 minutes after ECT
Sawa (1981)	9		Endogenous depression, unipolar (n = 8) or bipolar (n = 1)	Self-rating depression scale, Hamilton's depression scale, Bojanovksy's depression scale	Number of phase, time since onset of current phase and beginning of medication	Amitriptyline (n = 8), clomipramine (n = 1)						Self-rating depression scale, Hamilton's depression scale, Bojanovksy's depression scale		Amobarbital	Samples taken before and after the first ECT of a full treatment series	1, 5, 10, 30 and 60 minutes after ECT
Mokhtar (1997)	10		Endogenous depression, unipolar (n = 7) or bipolar (n = 3)	HDRS > 17		Antidepressants (n = 10, 100%)						HDRS	Bilateral. Duration: 4 seconds 37.93 J		One single ECT	15, 30, 45 and 60 minutes after ECT	Good seizure quality in 9/10 patients.
Palmio (2005)	10		Major depressive disorder	MADRS 29 (5.9) 1	Psychotic feautres (n = 4)	Neuroleptics (n = 8), antidepressants (n = 7), benzodiazepines (n = 6)		Unchanged before and during ECT		One case of ischemic heart disease, otherwise none		MADRS	Brief-pulse, bilateral. Charge: mean = 272.2 mC Seizure duration: mean = 45.7	Propofol (n = 5) or methohexital (n = 5), and succinylcholine	Samples taken at different stage in the treatment series for each patient	2, 6, 24 and 48 hours after ECT	MADRS: 8.9 (8.9) 1 after the full ECT series.
				Measure at baseline / declared				Analyses of change after ECT / used as covariable or for stratification in sub-analyses							Included as covariable in main analyses
				Not measured / not declared / not considered				Not relevant for the study in question
The table is limited to factors that have been included in at least one of the reviewed studies. * The number in parentheses indicates the number of patients with repeated measures. 1 mean (standar deviation); 2 median (interquartile range); 3 mean (range); 4 mean (standard error of the mean). Abbreviations: CODS, Cronholm-Ottosson Depression Scale; ECT, electroconvulsive therapy; GAF, Global Ass…
