# Supplementary material for: Changes in Tryptophan-Kynurenine Metabolism in Patients with Depression Undergoing ECT—A Systematic Review
Source: Pharmaceuticals (Basel). 2022 Nov 19;15(11):1439. doi: 10.3390/ph15111439 (PMC9694349; doi:10.3390/ph15111439)
Supplement: Supplementary file 1 [file pharmaceuticals-15-01439-s001.zip › Table S3.pdf]

**Supplementary Table 3** Data on storage and analytical procedures in the reviewed studies

| Author (year)    | Storage                                                                                                                                 | Analytical procedure                                                                                                                                                                                                        | Articles cited                                                                                                                                                                                                                                                                                                                                                                                                                                                                                                                                                                                                                                                                                 |
|------------------|-----------------------------------------------------------------------------------------------------------------------------------------|-----------------------------------------------------------------------------------------------------------------------------------------------------------------------------------------------------------------------------|------------------------------------------------------------------------------------------------------------------------------------------------------------------------------------------------------------------------------------------------------------------------------------------------------------------------------------------------------------------------------------------------------------------------------------------------------------------------------------------------------------------------------------------------------------------------------------------------------------------------------------------------------------------------------------------------|
| Guloksuz (2015)  | "Serum was separated and stored at -80°C"                                                                                               | "High performance liquid chromatography (HPLC) was used [ ]. Metabolites were detected "spectrophotometrically", "fluorimetrically" or "by UV detection".                                                                   | Hervé et al. (1996) <i>Determination of tryptophan and its kynurenine pathway metabolites in human serum by high-performance liquid chromatography with simultaneous ultraviolet and fluorimetric detection</i> . J. Chromatogr. B 675, 157–161.<br><br>Oades et al. (2010a) <i>Attention-deficit hyperactivity disorder (ADHD) and glial integrity: S100B, cytokines and kynurenine metabolism-effects of medication</i> . Behav. Brain Funct. 6, 29.<br><br>Oades et al. (2010b) <i>Attention-deficit hyperactivity disorder (ADHD) and glial integrity: an exploration of associations of cytokines and kynurenine metabolites with symptoms and attention</i> . Behav. Brain Funct. 6, 32. |
| Schwieler (2016) | "Blood samples were centrifuged [ ], and plasma was collected and stored at -70 °C until analysis"                                      | "Analysis of KYNA was measured by high-performance liquid chromatography (HPLC) with fluorescence detection."<br><br>"[For tryptophan, kynurenine and QUIN the] detection was performed using a [ ] mass spectrometer [ ]." | Olsson et al. (2010) <i>Elevated levels of kynurenic acid in the cerebrospinal fluid of patients with bipolar disorder</i> . J Psychiatry Neurosci. 35 (3): 195–9.                                                                                                                                                                                                                                                                                                                                                                                                                                                                                                                             |
| Allen (2018)     | "Samples were centrifuged immediately and frozen at -80 °C."                                                                            | "[ ] analysis on the HPLC system (UV and FLD detection)."                                                                                                                                                                   | Clarke et al. (2009) <i>Tryptophan degradation in irritable bowel syndrome: evidence of indoleamine 2,3-dioxygenase activation in a male cohort</i> . BMC Gastroenterol. 9 (1), 6.                                                                                                                                                                                                                                                                                                                                                                                                                                                                                                             |
| Aarsland (2019)  | "[ ] serum separated and stored at -80 °C until analysis."                                                                              | "[ ] liquid chromatography-tandem mass spectrometry."                                                                                                                                                                       | Midttun et al. (2009) <i>Quantitative profiling of biomarkers related to B-vitamin status, tryptophan metabolism and inflammation in human plasma by liquid chromatography/tandem mass spectrometry</i> . Rapid Commun Mass Spectrom 23 (9): 1371–1379.                                                                                                                                                                                                                                                                                                                                                                                                                                        |
| Ryan (2020)      | "Plasma was stored in aliquots at -80 °C until analysis."                                                                               | "Liquid chromatography-tandem mass spectrometry"                                                                                                                                                                            | Midttun et al. (2009) <i>Quantitative profiling of biomarkers related to B-vitamin status, tryptophan metabolism and inflammation in human plasma by liquid chromatography/tandem mass spectrometry</i> . Rapid Commun Mass Spectrom 23 (9): 1371–1379.<br><br>Midttun et al. (2013) <i>High-throughput, low-volume, multi-analyte quantification of plasma metabolites related to one-carbon metabolism using HPLC-MS/MS</i> . Anal. Bioanal. Chem. 405, 2009–2017.                                                                                                                                                                                                                           |
| Aarsland (2022)  | Not described                                                                                                                           | "[ ] liquid chromatography / tandem mass spectrometry."                                                                                                                                                                     | Midttun et al. (2009) <i>Quantitative profiling of biomarkers related to B-vitamin status, tryptophan metabolism and inflammation in human plasma by liquid chromatography/tandem mass spectrometry</i> . Rapid Commun Mass Spectrom 23 (9): 1371–1379.                                                                                                                                                                                                                                                                                                                                                                                                                                        |
| Olajosy (2017)   | "[ ] the supernatant was collected and frozen at -72°C."                                                                                | "The content of KYNA in serum was assessed [ ] using a Varian Pro Star 210 liquid chromatograph [ ]."                                                                                                                       | Turski et al (1988) <i>Identification and quantification of kynurenic acid in human brain tissue</i> . Brain Res. 454(1–2): 164–169.                                                                                                                                                                                                                                                                                                                                                                                                                                                                                                                                                           |
| Coppen (1973)    | "[ ] samples of the ultra filtrate and plasma were deep-frozen."                                                                        | "Free and total acid-soluble tryptophan were [ ] estimated by a modification of the method of Denckla and Dewey." (Spectrofluorometry)                                                                                      | Denckla and Dewey (1967) <i>The determination of tryptophan in plasma, liver and urine</i> . J. lab. clin. Med. 69, 160-169.                                                                                                                                                                                                                                                                                                                                                                                                                                                                                                                                                                   |
| Abrams (1976)    | "The first 8-10 ml of CSF was placed without preservative in a freezer at -20 C within 5 min of removal and was stored until analysis." | "A third aliquot was assayed for TRYP contend using an adaptation of a tissue assay for this aromatic amino acid (Tagliamonte et al., 1971)." (Spectrofluorometry)                                                          | Taglimonte et al. (1971) <i>Effect of psychotropic drugs and tryptophan in the rat brain</i> . J. Pharmacol. Exptl. Therap. 177: 475.                                                                                                                                                                                                                                                                                                                                                                                                                                                                                                                                                          |
| D'Elia (1977)    | Not described                                                                                                                           | "Analyses of total L-TP concentrations were performed according to Denckla & Dewey (1967) [ ]." (Spectrofluorometry)                                                                                                        | Denckla and Dewey (1967) <i>The determination of tryptophan in plasma, liver and urine</i> . J. lab. clin. Med. 69, 160-169.                                                                                                                                                                                                                                                                                                                                                                                                                                                                                                                                                                   |

|                   |                                                                                                                                                                   |                                                                                                                                                                    |                                                                                                                                                                                                                                                                                               |
|-------------------|-------------------------------------------------------------------------------------------------------------------------------------------------------------------|--------------------------------------------------------------------------------------------------------------------------------------------------------------------|-----------------------------------------------------------------------------------------------------------------------------------------------------------------------------------------------------------------------------------------------------------------------------------------------|
| Kirkegaard (1978) | "The EDTA-2Na stabilized plasma was stored at -20°C."                                                                                                             | "[] the ultrafiltration and the determination of total and free tryptophan was carried out as described elsewhere (Møller et al. (1976))."<br>(Spectrofluorometry) | Møller et al. (1976): Plasma amino acids as an index for subgroups in manic depressive psychosis: correlation to effect of tryptophan. <i>Psychopharmacology</i> 49, 205-213.<br><br>In which "The total acid-soluble and the free TRY were determined according to Denckla and Dewey (1967)" |
| Whalley (1980)    | "Plasma and ultrafiltrate were stored at -20°C until assayed for total and free tryptophan, respectively."                                                        | "Plasma and ultrafiltrate were stored at -20°C until assayed for total and free tryptophan, respectively."<br>(Spectrofluorometry)                                 | Hess and Udenfreid (1959) <i>A fluorometric procedure for the estimation of tryptamine in tissues</i> . <i>Journal of Pharmacology and Experimental Therapeutics</i> 127, 175-177                                                                                                             |
| Hoekstra (2001)   | "Immediately after venipuncture, plasma was prepared [] and stored at -80°C"                                                                                      | "The amino acids [] were measured by means of high-performance liquid chromatography."<br>(HPLC + fluorescence detection)                                          | Fekkes et al. (1995) <i>Validation of the determination of amino acids in plasma by high-performance liquid chromatography using automated derivatization with o-phthalaldehyde</i> . <i>Journal of Chromatography B</i> 669, 177-186.                                                        |
| Stelmasiak (1974) | "The blood was collected into heparinized tubes, centrifuged immediately and the plasma kept frozen at -20°C until it was used for determinations within 1 week." | "Tryptophan was determined using the method of Denckla and Dewey (1967) in whole plasma and also in an ultrafiltrate []."<br>(spectrofluorometry)                  | Denckla and Dewey (1967) <i>The determination of tryptophan in plasma, liver and urine</i> . <i>J. lab. clin. Med.</i> 69, 160-169.                                                                                                                                                           |
| Sawa (1981)       | "Immediately after blood collection, blood was centrifuged at 1000 g for 15 min at ice cold, and the plasma was kept frozen at -20°C till measurement."           | "The contents of free (non-albumin bound) tryptophan and total tryptophan were determined spectrofluorometrically."                                                | Denckla and Dewey (1967) <i>The determination of tryptophan in plasma, liver and urine</i> . <i>J. lab. clin. Med.</i> 69, 160-169.                                                                                                                                                           |
| Mokhtar (1997)    | "Serum was prepared within 60-120 min from venesection and was analyzed either freshly or within 2 days of storage at -20°C."                                     | "Free (ultra-filterable) and total (free plus albumin-bound) Trp concentrations were determined fluorimetrically as described previously (Badawy and Evans 1976)." | Badawy AA-B, Evans M (1976): <i>Animal liver tryptophan pyrrolases - Absence of apoenzyme and of hormonal induction mechanism from species sensitive to tryptophan toxicity</i> . <i>Biochem J</i> 158:79-88.<br><br>which uses a modified version of Denckla and Dewey (1967).               |
| Palmio (2005)     | "The samples were [] stored at -70°C before the analyses."                                                                                                        | "[] high-performance liquid chromatography."                                                                                                                       |                                                                                                                                                                                                                                                                                               |

The information presented in this table is selected excerpts from the reviewed studies' method sections, and not the complete method descriptions.
